# Supplementary material for: Design and Characterization of a Novel Hapten and Preparation of Monoclonal Antibody for Detecting Atrazine
Source: MDPI journal article supplement (doi:10.3390/foods11121726), 2022-06-13
Supplement: s1 [file s1]

## **Design and characterization of a novel hapten and preparation of monoclonal antibody for detecting atrazine**

Lingyuan Xu <sup>a</sup>, A.M. Abd El-Aty<sup>b,c</sup>, Jae-Han Shim<sup>d</sup>, Jong-Bang Eun<sup>e</sup>, Xingmei Lei <sup>a</sup>, Jing Zhao <sup>a</sup>, Xiuyuan Zhang <sup>a</sup>, Xueyan Cui <sup>a</sup>, Yongxin She <sup>a</sup>, Fen Jin<sup>a</sup>, Lufei Zheng<sup>a</sup>, Jing Wang<sup>a</sup>, Maojun Jina <sup>\*</sup> and Bruce D. Hammock<sup>f</sup>

<sup>a</sup> *Institute of Quality Standard and Testing Technology for Agro-Products, Chinese Academy of Agricultural Sciences, Beijing 100081, China*

<sup>b</sup> *Department of Pharmacology, Faculty of Veterinary Medicine, Cairo University, Giza 12211, Egypt*

<sup>c</sup> *Department of Medical Pharmacology, Medical Faculty, Ataturk University, Erzurum 25240, Turkey*

<sup>d</sup> *Natural Products Chemistry Laboratory, Biotechnology Research Institute, Chonnam National University, Yongbong-ro, Buk-gu, Gwangju 500-757, Republic of Korea*

<sup>e</sup> *Department of Food Science and Technology, Chonnam National University, Gwangju, South Korea*

<sup>f</sup> *Department of Entomology & Nematology and the UC Davis Comprehensive Cancer Center, University of California, Davis, CA 95616, USA*

**\* Corresponding authors**

**Maojun Jin, E-mail:** jinmaojun@caas.cn, **Tel.:** +86-10-8210-6570

**Table S1.** Serum potency and inhibition rate of ATZ in mice.

| Immunization cycle  | Dilution of immunogen<br>(Serum dilution) | $0.5 \times 10^3$ |        |        | $1 \times 10^3$ |        |        | $2 \times 10^3$ |        |        | $4 \times 10^3$  |        |        |
|---------------------|-------------------------------------------|-------------------|--------|--------|-----------------|--------|--------|-----------------|--------|--------|------------------|--------|--------|
|                     |                                           | C                 | I      | IR     | C               | I      | IR     | C               | I      | IR     | C                | I      | IR     |
| Third immunization  | $0.5 \times 10^3$                         | 3.5136            | 3.5654 | -1.47% | 3.5004          | 3.6343 | -3.83% | 3.5473          | 3.6033 | -1.58% | 3.3066           | 3.3732 | -2.01% |
|                     | $1 \times 10^3$                           | 3.6391            | 3.4826 | 4.30%  | 3.6913          | 3.4873 | 5.53%  | 3.5664          | 3.4228 | 4.03%  | 3.6266           | 3.0506 | 15.88% |
|                     | $2 \times 10^3$                           | 3.4913            | 3.3666 | 3.57%  | 3.6095          | 3.3089 | 8.33%  | 3.4381          | 2.9646 | 13.77% | 3.3302           | 2.7037 | 18.81% |
|                     | $4 \times 10^3$                           | 3.4086            | 3.1808 | 6.68%  | 3.2329          | 2.9949 | 7.36%  | 3.3495          | 2.5193 | 24.79% | 3.2076           | 1.927  | 39.92% |
| Immunization cycle  | Dilution of immunogen<br>(Serum dilution) | $2 \times 10^3$   |        |        | $4 \times 10^3$ |        |        | $8 \times 10^3$ |        |        | $16 \times 10^3$ |        |        |
|                     |                                           | C                 | I      | IR     | C               | I      | IR     | C               | I      | IR     | C                | I      | IR     |
| Fourth immunization | $8 \times 10^3$                           | 3.8307            | 3.0001 | 21.68% | 3.7991          | 2.7415 | 27.84% | 3.5665          | 2.3499 | 34.11% | 3.6115           | 1.7387 | 51.86% |
|                     | $16 \times 10^3$                          | 3.6223            | 1.5249 | 57.90% | 3.6875          | 1.5868 | 56.97% | 3.5247          | 1.2492 | 64.56% | 3.2604           | 0.8371 | 74.33% |
|                     | $32 \times 10^3$                          | 2.9148            | 0.7982 | 72.62% | 2.8312          | 0.8484 | 70.03% | 2.3959          | 0.4884 | 79.62% | 2.0832           | 0.3863 | 81.46% |
|                     | $64 \times 10^3$                          | 1.3083            | 0.5222 | 60.09% | 2.8312          | 0.8484 | 70.03% | 1.2363          | 0.2959 | 76.07% | 1.0204           | 0.2574 | 74.77% |

**Note:** “C” represents control wells, “I” represents inhibition wells, and “IR” represents inhibition rate. The inhibitory concentration of ATR was 100 ng/mL.

**Table S2.** Serum titer and inhibition rate of mouse for fusion experiment.

| Dilution of immunogen<br>(Serum dilution times) | 2×10 <sup>3</sup> |        |        | 4×10 <sup>3</sup> |        |         | 8×10 <sup>3</sup> |        |         | 16×10 <sup>3</sup> |        |        |
|-------------------------------------------------|-------------------|--------|--------|-------------------|--------|---------|-------------------|--------|---------|--------------------|--------|--------|
|                                                 | C                 | I      | IR     | C                 | I      | IR      | C                 | I      | IR      | C                  | I      | IR     |
| <b>0.5K</b>                                     | 2.951             | 3.1162 | −5.60% | 3.13              | 3.2666 | −4.36%  | 3.2514            | 3.4754 | −6.89%  | 3.4926             | 3.5829 | −2.59% |
| <b>1K</b>                                       | 3.0572            | 3.0072 | 1.64%  | 3.0814            | 3.2014 | −3.89%  | 3.1114            | 3.2247 | −3.64%  | 3.2167             | 3.1608 | 1.74%  |
| <b>2K</b>                                       | 3.0257            | 3.0787 | −1.75% | 3.1605            | 3.3588 | −6.27%  | 3.2629            | 3.4687 | −6.31%  | 3.1772             | 3.1995 | −0.70% |
| <b>4K</b>                                       | 3.0563            | 3.0167 | 1.30%  | 2.7498            | 3.151  | −14.59% | 3.12              | 3.296  | −5.64%  | 3.2234             | 3.0907 | 4.12%  |
| <b>8K</b>                                       | 3.0067            | 3.0637 | −1.90% | 2.7363            | 3.5006 | −27.93% | 3.0554            | 3.4181 | −11.87% | 3.136              | 2.5625 | 18.29% |
| <b>16K</b>                                      | 3.0408            | 3.272  | −7.60% | 2.8192            | 3.3036 | −17.18% | 3.213             | 2.6117 | 18.71%  | 3.3254             | 1.6754 | 49.62% |
| <b>32K</b>                                      | 3.234             | 2.7661 | 14.47% | 3.3175            | 2.1717 | 34.54%  | 3.3523            | 1.3781 | 58.89%  | 3.4339             | 0.8096 | 76.42% |
| <b>64K</b>                                      | 3.2949            | 2.6451 | 19.72% | 3.3516            | 1.6636 | 50.36%  | 3.1482            | 0.8823 | 71.97%  | 2.7227             | 0.5444 | 80.01% |

  

| Dilution of immunogen<br>(Serum dilution times) | 32×10 <sup>3</sup> |        |        | 64×10 <sup>3</sup> |        |        | 128×10 <sup>3</sup> |        |        | 256×10 <sup>3</sup> |        |        |
|-------------------------------------------------|--------------------|--------|--------|--------------------|--------|--------|---------------------|--------|--------|---------------------|--------|--------|
|                                                 | C                  | I      | IR     | C                  | I      | IR     | C                   | I      | IR     | C                   | I      | IR     |
| <b>0.5K</b>                                     | 3.4679             | 3.1281 | 9.80%  | 3.472              | 3.5448 | −2.10% | 1.4202              | 0.8769 | 38.26% | 0.7161              | 0.7447 | −3.99% |
| <b>1K</b>                                       | 3.3136             | 3.6357 | −9.72% | 3.0714             | 3.0347 | 1.19%  | 1.2275              | 0.816  | 33.52% | 0.6642              | 0.3648 | 45.08% |
| <b>2K</b>                                       | 3.4255             | 3.3286 | 2.83%  | 3.5234             | 2.6797 | 23.95% | 1.0295              | 0.3413 | 66.85% | 0.6154              | 0.2071 | 66.35% |
| <b>4K</b>                                       | 3.3286             | 2.696  | 19.00% | 3.497              | 1.7998 | 48.53% | 0.8119              | 0.2032 | 74.97% | 0.5308              | 0.1493 | 71.87% |
| <b>8K</b>                                       | 3.4857             | 1.8158 | 47.91% | 3.4263             | 1.0965 | 68.00% | 0.6297              | 0.166  | 73.64% | 0.4437              | 0.122  | 72.50% |
| <b>16K</b>                                      | 3.4798             | 0.9567 | 72.51% | 3.1996             | 0.6055 | 81.08% | 0.4244              | 0.1259 | 70.33% | 0.2879              | 0.1195 | 58.49% |
| <b>32K</b>                                      | 3.0233             | 0.4523 | 85.04% | 2.2536             | 0.3176 | 85.91% | 0.2812              | 0.1172 | 58.32% | 0.1931              | 0.1526 | 20.97% |
| <b>64K</b>                                      | 1.993              | 0.3236 | 83.76% | 1.4006             | 0.222  | 84.15% | 0.2388              | 0.1477 | 38.15% | 0.2111              | 0.2275 | −7.77% |

**Note:** “C” represents control wells, “I” represents inhibition wells, and “IR” represents inhibition rate. Inclusion source concentration 1 mg/mL.

The inhibitory concentration of ATR was 1000 ng/mL.

**Table S3.** Titer and inhibition rate of mouse ascites before purification.

| Dilution of immunogen<br>(Serum dilution times) | <b>1.6×10<sup>4</sup></b> |          |           | <b>3.2×10<sup>4</sup></b>  |          |           |
|-------------------------------------------------|---------------------------|----------|-----------|----------------------------|----------|-----------|
|                                                 | <b>C</b>                  | <b>I</b> | <b>IR</b> | <b>C</b>                   | <b>I</b> | <b>IR</b> |
| <b>16K</b>                                      | Overflow                  | 0.1467   | —         | 3.9433                     | 0.1259   | 96.81%    |
| <b>32K</b>                                      | Overflow                  | 0.1181   | —         | 3.859                      | 0.094    | 97.56%    |
| <b>64K</b>                                      | 3.8019                    | 0.1776   | 95.33%    | 3.4209                     | 0.0917   | 97.32%    |
| <b>128K</b>                                     | 3.0072                    | 0.1009   | 96.64%    | 2.6763                     | 0.0965   | 96.39%    |
| <b>256K</b>                                     | 2.112                     | 0.1159   | 94.51%    | 1.7206                     | 0.0957   | 94.44%    |
| Dilution of immunogen<br>(Serum dilution times) | <b>6.4×10<sup>4</sup></b> |          |           | <b>1.28×10<sup>5</sup></b> |          |           |
|                                                 | <b>C</b>                  | <b>I</b> | <b>IR</b> | <b>C</b>                   | <b>I</b> | <b>IR</b> |
| <b>16K</b>                                      | 3.6164                    | 0.0981   | 97.29%    | 2.5838                     | 0.0964   | 96.27%    |
| <b>32K</b>                                      | 3.2234                    | 0.0858   | 97.34%    | 2.027                      | 0.0853   | 95.79%    |
| <b>64K</b>                                      | 2.3793                    | 0.0837   | 96.48%    | 1.571                      | 0.0835   | 94.68%    |
| <b>128K</b>                                     | 1.7889                    | 0.0879   | 95.09%    | 1.0773                     | 0.1127   | 89.54%    |
| <b>256K</b>                                     | 1.1408                    | 0.0914   | 91.99%    | 0.6757                     | 0.0988   | 85.38%    |

**Note:** “C” represents control wells, “I” represents inhibition wells, and “IR” represents inhibition rate. The concentration of the coating agent was 1 mg/mL. The inhibitory concentration of ATR was 100 ng/mL. “Overflow” indicated that the OD<sub>450nm</sub> value was outside the detection range of the instrument. “—” indicates that the result are not calculated.

**Table S4.** Determination of the optimal concentrations of antigen and antibody.

| Dilution of immunogen<br>(Serum dilution times) | $2 \times 10^3$ |        |        | $4 \times 10^3$ |        |        | $8 \times 10^3$ |        |        | $16 \times 10^3$ |        |        |
|-------------------------------------------------|-----------------|--------|--------|-----------------|--------|--------|-----------------|--------|--------|------------------|--------|--------|
|                                                 | C               | I      | IR     | C               | I      | IR     | C               | I      | IR     | C                | I      | IR     |
| <b>2K</b>                                       | 3.6308          | 2.368  | 34.78% | 3.5449          | 1.1545 | 67.43% | 3.8403          | 0.5585 | 85.46% | 3.4926           | 3.5829 | -2.59% |
| <b>4K</b>                                       | 3.6817          | 1.2912 | 64.93% | 3.6933          | 0.64   | 82.67% | 3.7294          | 0.2896 | 92.23% | 3.2167           | 3.1608 | 1.74%  |
| <b>8K</b>                                       | 3.756           | 0.7204 | 80.82% | 3.5538          | 0.3863 | 89.13% | 3.3562          | 0.1906 | 94.32% | 3.1772           | 3.1995 | -0.70% |
| <b>16K</b>                                      | 3.1678          | 0.4306 | 86.41% | 3.4571          | 0.2385 | 93.10% | 3.103           | 0.145  | 95.33% | 3.2234           | 3.0907 | 4.12%  |
| <b>32K</b>                                      | 2.715           | 0.2321 | 91.45% | 2.2273          | 0.1489 | 93.31% | 1.9538          | 0.1086 | 94.44% | 3.136            | 2.5625 | 18.29% |
| <b>64K</b>                                      | 1.547           | 0.1704 | 88.99% | 1.3833          | 0.1177 | 91.49% | 1.158           | 0.0967 | 91.65% | 3.3254           | 1.6754 | 49.62% |
| <b>128K</b>                                     | 0.8689          | 0.1238 | 85.75% | 0.7856          | 0.1007 | 87.18% | 0.7009          | 0.0837 | 88.06% | 3.4339           | 0.8096 | 76.42% |
| <b>256K</b>                                     | 0.5411          | 0.1105 | 79.58% | 0.4537          | 0.0889 | 80.41% | 0.3985          | 0.0848 | 78.72% | 2.7227           | 0.5444 | 80.01% |

  

| Dilution of immunogen<br>(Serum dilution times) | $32 \times 10^3$ |        |        | $64 \times 10^3$ |        |        | $128 \times 10^3$ |        |        | $256 \times 10^3$ |        |        |
|-------------------------------------------------|------------------|--------|--------|------------------|--------|--------|-------------------|--------|--------|-------------------|--------|--------|
|                                                 | C                | I      | IR     | C                | I      | IR     | C                 | I      | IR     | C                 | I      | IR     |
| <b>2K</b>                                       | 3.6581           | 0.297  | 91.88% | 2.9236           | 0.2119 | 92.75% | 1.9484            | 0.1522 | 92.19% | 0.7161            | 0.7447 | -3.99% |
| <b>4K</b>                                       | 3.1739           | 0.177  | 94.42% | 2.6811           | 0.1347 | 94.98% | 1.7007            | 0.1129 | 93.36% | 0.6642            | 0.3648 | 45.08% |
| <b>8K</b>                                       | 2.9019           | 0.125  | 95.69% | 1.9539           | 0.1089 | 94.43% | 1.2453            | 0.0975 | 92.17% | 0.6154            | 0.2071 | 66.35% |
| <b>16K</b>                                      | 2.1751           | 0.1029 | 95.27% | 1.4851           | 0.0937 | 93.69% | 0.9228            | 0.0841 | 90.89% | 0.5308            | 0.1493 | 71.87% |
| <b>32K</b>                                      | 1.368            | 0.0865 | 93.68% | 0.8325           | 0.0829 | 90.04% | 0.5497            | 0.0852 | 84.50% | 0.4437            | 0.122  | 72.50% |
| <b>64K</b>                                      | 0.8175           | 0.0804 | 90.17% | 0.5236           | 0.0808 | 84.57% | 0.3527            | 0.0804 | 77.20% | 0.2879            | 0.1195 | 58.49% |
| <b>128K</b>                                     | 0.4996           | 0.0808 | 83.83% | 0.361            | 0.0764 | 78.84% | 0.2353            | 0.0773 | 67.15% | 0.1931            | 0.1526 | 20.97% |
| <b>256K</b>                                     | 0.2966           | 0.0781 | 73.67% | 0.2135           | 0.0774 | 63.75% | 0.156             | 0.0739 | 52.63% |                   |        |        |

**Note:** “C” represents control wells, “I” represents inhibition wells, and “IR” represents inhibition rate. The inhibitory concentration of

ATR was 100 ng/mL.
